# Supplementary material for: On the use of composite analyses to form physical hypotheses: An example from heat wave – SST associations
Source: PubMed Central journal article supplement (PMC4944154; doi:10.1038/srep29599), 2016-07-14
Supplement: srep29599-s1.pdf [file srep29599-s1.pdf]

## **SUPPLEMENTARY INFORMATION**

**On the use of composite analyses to form physical hypotheses: An example from heat wave – SST associations**

Ghyslaine BOSCHAT<sup>\*1</sup>, Ian SIMMONDS<sup>1</sup>,  
Ariaan PURICH<sup>2</sup>, Tim COWAN<sup>3</sup> and Alexandre Bernardes PEZZA<sup>4</sup>

**CORRELATION VALUES**

|                        |                    | -1 | -0.9 | -0.8 | -0.7 | -0.6 | -0.5 | -0.4 | -0.3 | -0.2 | -0.1  | 0     | 0.1   | 0.2   | 0.3  | 0.4  | 0.5  | 0.6  | 0.7  | 0.8 | 0.9 | 1 |
|------------------------|--------------------|----|------|------|------|------|------|------|------|------|-------|-------|-------|-------|------|------|------|------|------|-----|-----|---|
| <b>SH</b>              | <i>75698 days</i>  |    |      |      |      |      |      |      | 332  | 3182 | 11984 | 22805 | 21871 | 11521 | 3434 | 579  |      |      |      |     |     |   |
|                        | <i>470 HW days</i> |    |      |      |      |      |      |      |      | 13   | 34    | 111   | 142   | 106   | 53   | 11   |      |      |      |     |     |   |
| <b>SIO</b>             | <i>75698 days</i>  |    |      | 217  | 1239 | 2913 | 4906 | 6265 | 7308 | 7759 | 7962  | 7675  | 7195  | 6915  | 5986 | 4738 | 2993 | 1340 | 284  | 3   |     |   |
|                        | <i>470 HW days</i> |    |      |      | 2    | 7    | 10   | 18   | 26   | 38   | 36    | 46    | 38    | 70    | 57   | 56   | 41   | 21   | 4    |     |     |   |
| <b>SIO - West pole</b> | <i>75698 days</i>  |    |      | 124  | 922  | 2808 | 4663 | 6541 | 7306 | 7814 | 8025  | 7864  | 7413  | 6773  | 6020 | 4842 | 3070 | 1338 | 171  | 4   |     |   |
|                        | <i>470 HW days</i> |    |      |      | 1    | 6    | 12   | 30   | 29   | 29   | 50    | 44    | 44    | 47    | 52   | 60   | 42   | 21   | 3    |     |     |   |
| <b>SIO - East pole</b> | <i>75698 days</i>  |    | 3    | 340  | 1305 | 2977 | 4567 | 5745 | 6863 | 7621 | 8246  | 8313  | 7772  | 6965  | 5787 | 4671 | 2967 | 1334 | 220  | 2   |     |   |
|                        | <i>470 HW days</i> |    |      | 4    |      | 13   | 12   | 15   | 35   | 42   | 34    | 50    | 51    | 64    | 54   | 44   | 32   | 18   | 2    |     |     |   |
| <b>SIO - two poles</b> | <i>75698 days</i>  |    | 459  | 2305 | 3949 | 4615 | 5070 | 5415 | 5436 | 5584 | 5504  | 5493  | 5230  | 5155  | 5269 | 5017 | 4655 | 3920 | 2091 | 531 |     |   |
|                        | <i>470 HW days</i> |    |      | 4    | 7    | 16   | 15   | 17   | 22   | 25   | 27    | 27    | 23    | 36    | 57   | 50   | 50   | 54   | 30   | 10  |     |   |

**Supplementary Table S1:** Frequency table showing the aggregate number of days when the pattern correlation between the Perth HW SST observed composite (Fig. 2) and daily simulated SST anomalies falls within each 0.1 correlation bin, separately for the SH, SIO, SIO-West, East and two poles domains (shown in Fig. 2). Results are computed for the all DJF days (black values) and for selected HW days (green values) in each model during 1950-2005, and then numbers are cumulated across all models.

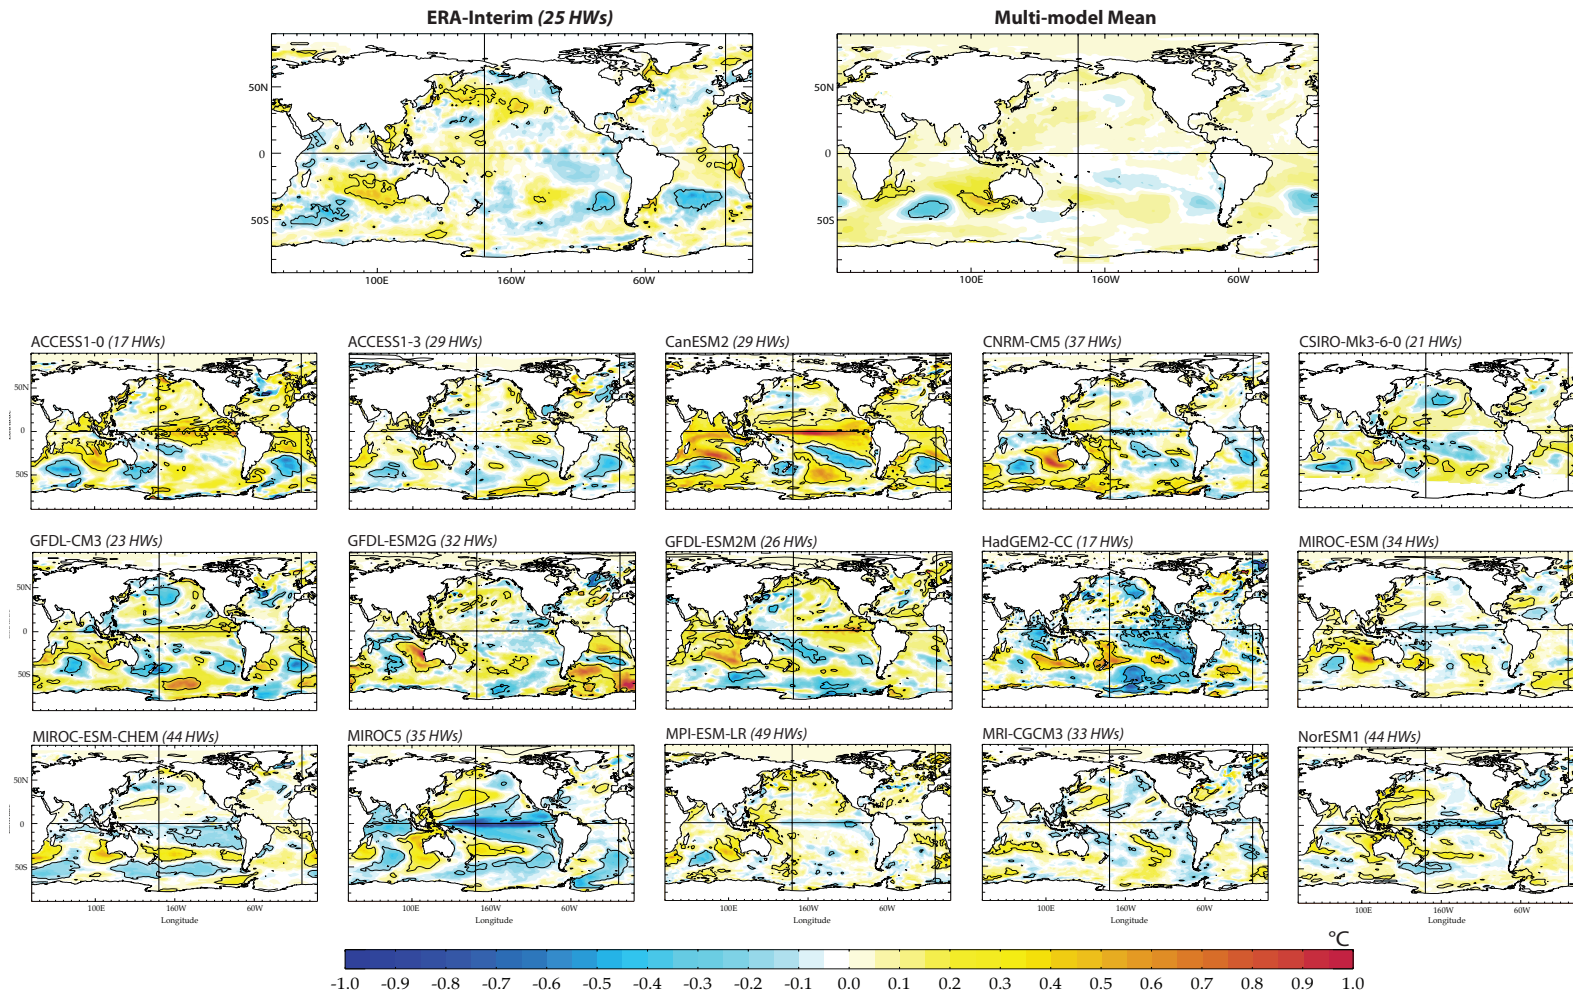

**Supplementary Figure S1: Composite SST anomalies during the first day of Perth HWs simulated in each CMIP5 model over 1950-2005.** The multi-model mean (MMM) is shown in the top panel, along with observations (ERA-Interim) over 1979-2014 for comparison. For each model, composite anomalies that are significant at the 90% confidence level using a Monte-Carlo procedure<sup>34</sup> are shown in black contours. In the MMM, each model is weighted evenly regardless of the number of HW events simulated, and regions are indicated where 80% of models agree on the sign of the MMM anomaly<sup>28</sup>. This figure was produced with IDL version 8.1 software (2011, Exelis Visual Information Solutions, Boulder, Colorado, [https://www.exelisvis.com/docs/whatsnew\\_in\\_8\\_1.html](https://www.exelisvis.com/docs/whatsnew_in_8_1.html)).
